# Supplementary material
Source: Springer Nature journal article supplement (https://www.springermedizin.de/resource/supplementary/13223_2013_381_MOESM3_ESM.pdf/9597786)

**A**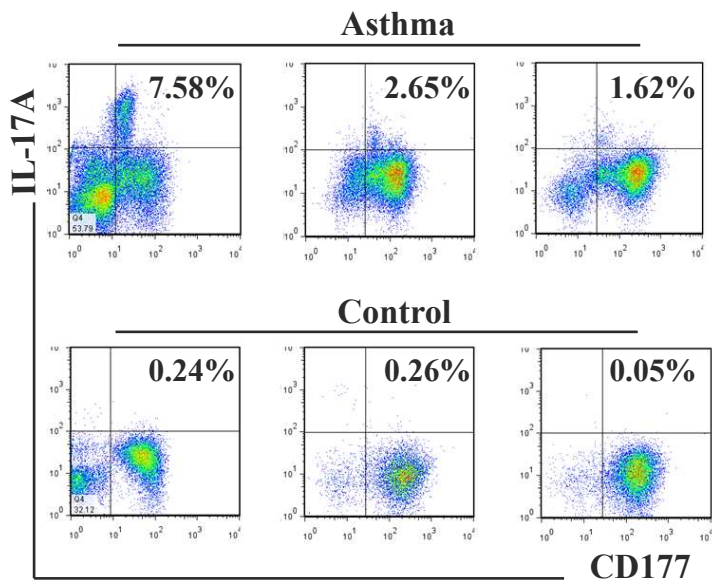**B**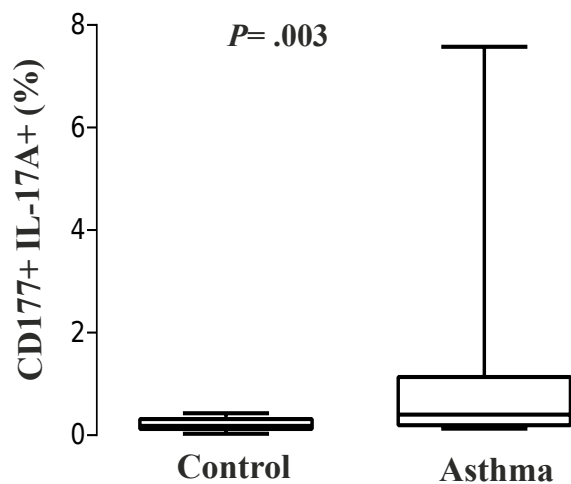**C**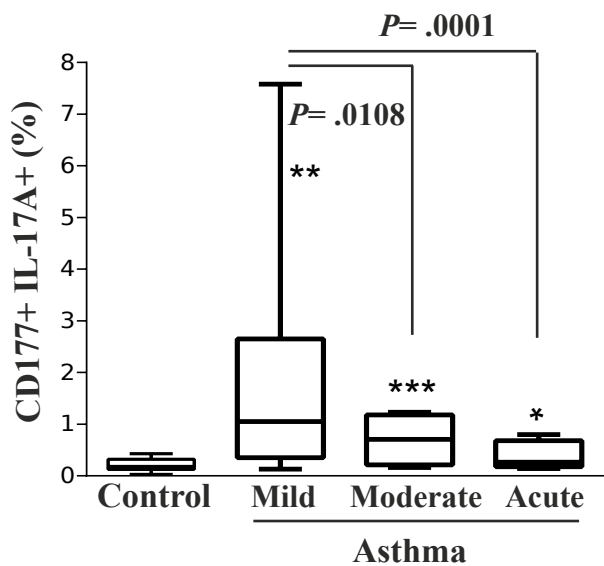**D**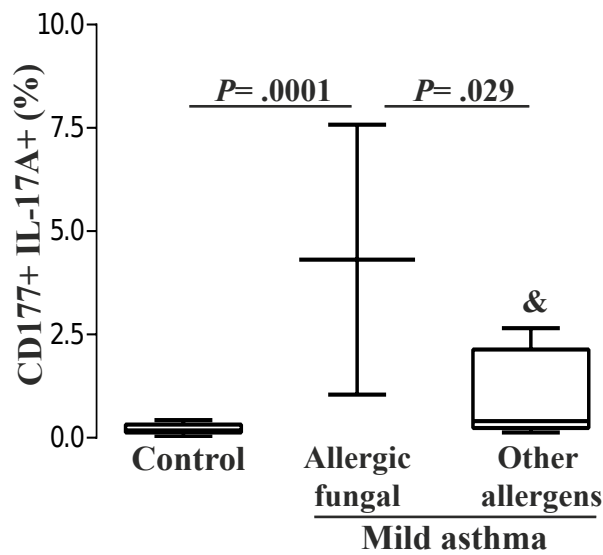

Supplement: MOESM3 [file 9597786]
